# Supplementary material
Source: Springer Nature journal article supplement (https://www.springermedizin.de/resource/supplementary/13256_2012_2550_MOESM1_ESM.pdf/9649884)

**(A)**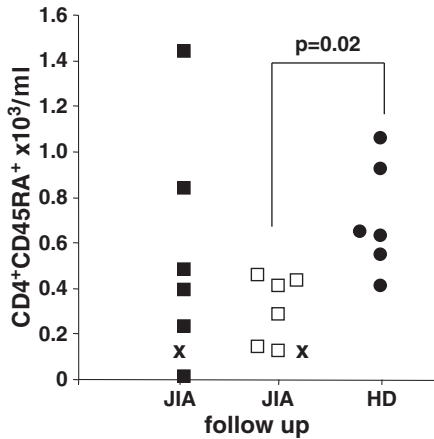**(B)**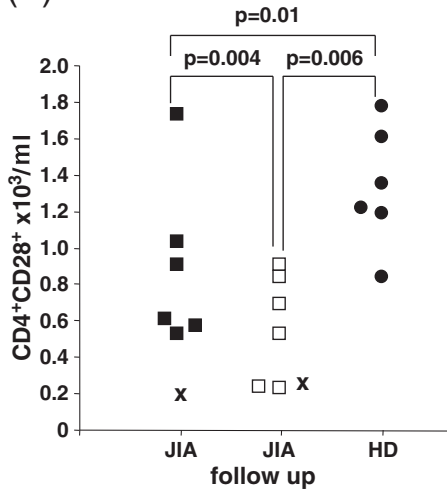

Supplement: MOESM1 [file 9649884]
